# Supplementary material for: Helper T cell immunity in humans with inherited CD4 deficiency
Source: PubMed Central journal article supplement (PMC10983808; doi:10.1084/jem.20231044), 2024-04-01
Supplement: JEM_20231044_SourceDataF3.pdf [file JEM_20231044_SourceDataF3.pdf]

C.

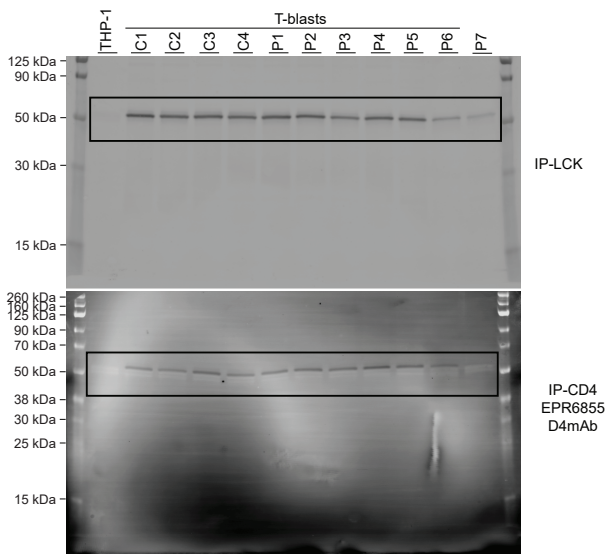

Westernblot antibodies: α-LCK

Fig. 3
